# Supplementary material for: An Emergency Department Intervention for Linking Pediatric Suicidal Patients to Follow-Up Mental Health Treatment
Source: Atypon-hosted journal article supplement (doi:10.1176/ps.62.11.pss6211_1303), 2011-11-01
Supplement: pss_62_11_1303_ds002.pdf [file pss_62_11_1303_ds002.pdf]

eTable 1. Suicide Attempt and Ideation Outcomes

| Variables              | Analytic<br>N | Unadjusted Estimate |     |           |     | Adjusted Analysis <sup>†</sup> |             |         |
|------------------------|---------------|---------------------|-----|-----------|-----|--------------------------------|-------------|---------|
|                        |               | FISP                |     | CONTROL   |     | Intervention vs. CONTROL       |             |         |
|                        |               | N                   | %   | N         | %   | OR <sup>a</sup>                | 95% CI      | P Value |
| Suicide attempts, DISC | 139           | 4                   | 6.4 | 5         | 6.5 | 1.0                            | .2 to 3.8   | .94     |
|                        |               | Mean ±SD            |     | Mean ±SD  |     | Group-difference <sup>b</sup>  | 95% CI      |         |
| HASS at follow-up      |               |                     |     |           |     |                                |             |         |
| Suicidal behavior      | 131           | 3.2±4.8             |     | 3.6±4.7   |     | -.3                            | -1.9 to 1.3 | .73     |
| Suicidal ideation      | 128           | 13.6±13.3           |     | 12.1±12.2 |     | 1.7                            | -2.7 to 6.2 | .44     |

Abbreviations: FISP, Family Intervention for Suicide Prevention; CONTROL, Emergency Department Treatment as Usual (Enhanced by Provider Education); SD, standard deviation; OR, odds ratio; RR, rate ratio; CI, confidence interval; DISC, Diagnostic Interview Schedule for Children; HASS, Harkavy Asnis Suicide Scale. HASS Suicidal Behavior, Range 0-25. HASS Passive Suicidal Ideation, Range 0-60.

<sup>†</sup>Baseline suicide attempts were adjusted for site, gender, age, and baseline CES-D; the follow-up analyses included additional variables of time to follow-up, baseline suicide attempts, and baseline CBCL Total Problem Score.

<sup>a</sup>Logistic regression; <sup>b</sup>Linear regression.

eTable 2. Clinical and Functioning Outcomes

|                                          | Analytic<br>N | Unadjusted Estimate |    |           |    | Adjusted Analysis <sup>†</sup> |             |         |
|------------------------------------------|---------------|---------------------|----|-----------|----|--------------------------------|-------------|---------|
|                                          |               | FISP                |    | CONTROL   |    | Between group<br>difference    | 95% CI      | P value |
|                                          |               | M±SD or N           | %  | M±SD or N | %  |                                |             |         |
| CES-D total score                        | 131           | 24.6±14.3           |    | 22.7±14.2 |    | 2.2                            | -2.4 to 6.8 | .35     |
| CES-D severe<br>range (≥ 24)             | 131           | 33                  | 57 | 33        | 45 | OR=1.8                         | .8 to 4.0   | .17     |
| CBCL<br>internalizing,                   | 128           | 65.8±11.8           |    | 64.9±11.8 |    | -1.0                           | -4.4 to 2.3 | .54     |
| CBCL<br>externalizing,                   | 128           | 65.0±10.0           |    | 62.8±11.9 |    | -.4                            | -3.3 to 2.4 | .76     |
| CBCL total<br>problems                   | 128           | 67.4±10.6           |    | 65.8±11.8 |    | -1.1                           | -3.9 to 1.7 | .45     |
| CBCL<br>internalizing<br>clinical range  | 128           | 35                  | 63 | 37        | 51 | OR=1.3                         | .5 to 3.1   | .62     |
| CBCL<br>externalizing<br>clinical range  | 128           | 31                  | 55 | 37        | 51 | OR=.6                          | .2 to 1.6   | .30     |
| CBCL total<br>problems clinical<br>range | 128           | 35                  | 63 | 45        | 63 | OR=.6                          | .2 to 1.6   | .31     |
| CBQ Family<br>Conflict                   | 129           | 5.3±3.8             |    | 4.8±4.1   |    | .1                             | -1.2 to 1.3 | .90     |
| Parent CES-D                             | 104           | 17.0±10.9           |    | 16.7±13.4 |    | .1                             | -4.4 to 4.6 | .97     |

Abbreviations: FISP, Family Intervention for Suicide Prevention; CONTROL, Emergency Department Treatment as Usual (Enhanced by Provider Education); SD, standard deviation; OR, odds ratio; CI, confidence interval; CES-D, Center for Epidemiological Studies-Depression Scale; CBCL, Child Behavior Checklist; CBQ, Conflict Behavior Questionnaire.

<sup>†</sup>Linear regressions for continuously scaled dependent variables and logistic regressions for binary variables; analyses adjusted for site, gender, age, time to follow-up, baseline CES-D, and baseline CBCL Total Problem Score.

eTable 3. Instrumental Variable Analysis Modeling Linkage to Any Outpatient Community Mental Health Treatment Post-ED/Hospital Discharge and Clinical/Functioning Outcomes

|                                                              | <i>Treatment Equation</i> |           |          |                | <i>Outcome Equation</i> |           |          |                |
|--------------------------------------------------------------|---------------------------|-----------|----------|----------------|-------------------------|-----------|----------|----------------|
|                                                              | <b>Coefficient</b>        | <b>SE</b> | <b>z</b> | <b>p-Value</b> | <b>Coefficient</b>      | <b>SE</b> | <b>z</b> | <b>p-Value</b> |
| <i>HASS Suicidal Behavior<sup>a</sup></i>                    |                           |           |          |                |                         |           |          |                |
| Any mental health treatment                                  |                           |           |          |                | -1.80                   | 3.40      | -.53     | .596           |
| FISP vs CONTROL                                              | .83                       | .33       | 2.51     | .012           |                         |           |          |                |
| Age                                                          | -.05                      | .08       | -.62     | .538           | -.19                    | .23       | -.86     | .388           |
| Female sex                                                   | -.33                      | .38       | -.87     | .385           | 1.69                    | 1.00      | 1.70     | .090           |
| Baseline CES-D                                               | .02                       | .01       | 1.38     | .166           | .07                     | .04       | 1.88     | .060           |
| Site                                                         | 1.26                      | .43       | 2.95     | .003           | .58                     | 1.13      | .51      | .611           |
| Intercept                                                    | .81                       | 1.24      | .65      | .517           | 3.82                    | 4.21      | .91      | .364           |
| <i>CES-D severe range (<math>\geq 24</math>)<sup>b</sup></i> |                           |           |          |                |                         |           |          |                |
| Any mental health treatment                                  |                           |           |          |                | 1.51                    | .47       | 3.18     | .001           |
| FISP vs CONTROL                                              | .88                       | .31       | 2.82     | .005           |                         |           |          |                |
| Age                                                          | -.04                      | .08       | -.46     | .648           | .00                     | .06       | .06      | .953           |
| Female sex                                                   | -.27                      | .37       | -.74     | .457           | .61                     | .27       | 2.24     | .025           |
| Baseline CES-D                                               | .01                       | .01       | 1.09     | .276           | .03                     | .01       | 2.58     | .010           |
| Site                                                         | 1.33                      | .44       | 3.03     | .002           | -.41                    | .26       | -1.57    | .115           |
| Intercept                                                    | .61                       | 1.21      | .51      | .612           | -2.64                   | 1.02      | -2.60    | .009           |

eTable 3. Instrumental Variable Analysis Modeling Linkage to Any Outpatient Community Mental Health Treatment Post-ED/Hospital Discharge and Clinical/Functioning Outcomes

|                                                                | <i>Treatment Equation</i> |           |          |                | <i>Outcome Equation</i> |           |          |                |
|----------------------------------------------------------------|---------------------------|-----------|----------|----------------|-------------------------|-----------|----------|----------------|
|                                                                | <b>Coefficient</b>        | <b>SE</b> | <b>z</b> | <b>p-Value</b> | <b>Coefficient</b>      | <b>SE</b> | <b>z</b> | <b>p-Value</b> |
| <i>CBCL total problems clinical range (&gt;63)<sup>b</sup></i> |                           |           |          |                |                         |           |          |                |
| Any mental health treatment                                    |                           |           |          |                | .36                     | 1.26      | .28      | .776           |
| FISP vs CONTROL                                                | .74                       | .37       | 1.99     | .047           |                         |           |          |                |
| Age                                                            | -.00                      | .10       | -.05     | .961           | -.08                    | .08       | -1.05    | .295           |
| Female sex                                                     | -.35                      | .41       | -.84     | .403           | .25                     | .32       | .80      | .425           |
| Baseline total problems                                        | .04                       | .02       | 2.43     | .015           | .09                     | .02       | 3.88     | <.001          |
| Site                                                           | 1.21                      | .39       | 3.09     | .002           | .62                     | .40       | 1.53     | .127           |
| Intercept                                                      | -1.87                     | 1.94      | -.96     | .336           | -5.03                   | 1.70      | -2.95    | .003           |

Abbreviations: FISP, Family Intervention for Suicide Prevention; CONTROL, Emergency Department Treatment as Usual (Enhanced by Provider Education); HASS, Harkavy Asnis Suicide Behavior Scale, Range 0-25. CES-D, Center for Epidemiological Studies-Depression Scale; CBCL, Child Behavior Checklist.

<sup>a</sup>Two step treatment-effects model using treatreg command in STATA version 11.1. <sup>b</sup>Bivariate probit model using biprobit command in STATA version 11.1.
