# Supplementary figures and images for: An Emergency Department Intervention for Linking Pediatric Suicidal Patients to Follow-Up Mental Health Treatment
Source: Atypon-hosted journal article supplement (doi:10.1176/ps.62.11.pss6211_1303), 2011-11-01

## Flow of Participants in the Intervention Trial

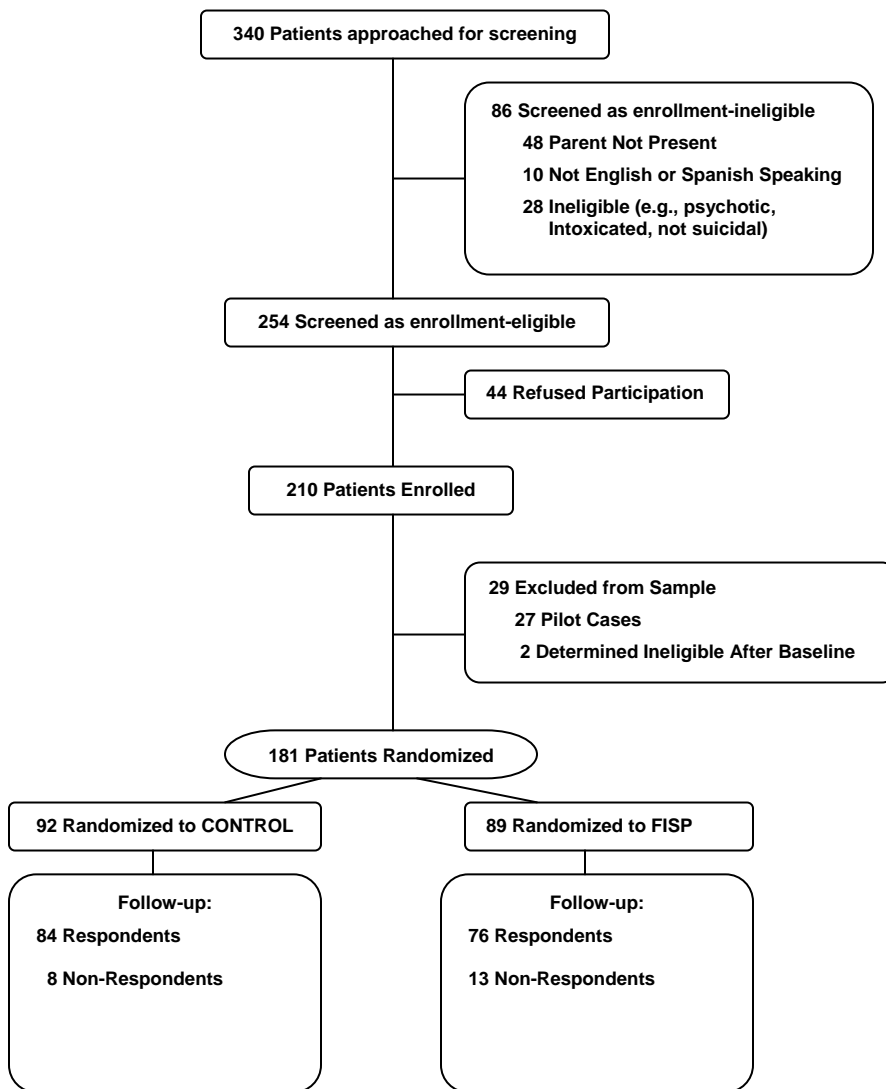

Supplement: pss_62_11_1303_ds001.pdf [file pss_62_11_1303_ds001.pdf]
